# Supplementary material for: Combination low-intensity chemotherapy plus inotuzumab ozogamicin, blinatumomab and rituximab for pediatric patients with relapsed/refractory B-cell acute lymphoblastic leukemia
Source: PubMed Central journal article supplement — Haematologica. 2024 May 23;109(9):3042–7. doi: 10.3324/haematol.2023.284950 (PMC11367183; doi:10.3324/haematol.2023.284950), 2024-05-23
Supplement: 2023_284950_GIBSON_SUPPL.pdf [file 2023_284950_GIBSON_SUPPL.pdf]

# Combination low-intensity chemotherapy plus inotuzumab ozogamicin, blinatumomab and rituximab for pediatric patients with relapsed/refractory B-cell acute lymphoblastic leukemia

## Authors

---

Amber Gibson,<sup>1</sup> Cesar Nunez,<sup>1</sup> Lindsay Robusto,<sup>2</sup> Brianna Kammerer,<sup>1</sup> Miriam Garcia,<sup>1</sup> Michael Roth,<sup>1</sup> Rachna Sheth,<sup>1</sup> Priti Tewari,<sup>1</sup> Aline Hittle,<sup>1</sup> Laurie Toepfer,<sup>1</sup> Romeo Torres,<sup>1</sup> Nicholas J. Short,<sup>3</sup> Elias Jabbour,<sup>3</sup> Nitin Jain,<sup>3</sup> Branko Cuglievan<sup>1</sup> and David McCall<sup>1</sup>

Correspondence:

A. GIBSON - [algibson2@mdanderson.org](mailto:algibson2@mdanderson.org)

<https://doi.org/10.3324/haematol.2023.284950>

<sup>1</sup>Department of Pediatrics; <sup>2</sup>Department of Pharmacy and <sup>3</sup>Department of Leukemia, The University of Texas MD Anderson Cancer Center, Houston, TX, USA

## Supplementary Table 1: Mini-Hyper CVD Treatment Schema

### Mini-hCVD (odd cycles)

|                            |                                                                           |
|----------------------------|---------------------------------------------------------------------------|
| <b>Cyclophosphamide</b>    | 150 mg/m <sup>2</sup> IV every 12 hours days 1-3 (6 total doses)          |
| <b>Dexamethasone</b>       | 10 mg/m <sup>2</sup> IV every 12 hours (max 20 mg/day) days 1-4 and 11-14 |
| <b>Vincristine</b>         | 1.5 mg/m <sup>2</sup> (max 2 mg/dose) IV days 1 and 8                     |
| <b>Peg filgrastim</b>      | 0.1 mg/kg (max 6 mg) subcutaneous day 4                                   |
| <b>Intrathecal therapy</b> | Dosing below. Days 1 and 8                                                |

### Methotrexate/Cytarabine (even cycles)

|                               |                                                                                                                            |
|-------------------------------|----------------------------------------------------------------------------------------------------------------------------|
| <b>Methotrexate</b>           | 250 mg/m <sup>2</sup> CIV over 24 hours (50 mg/m <sup>2</sup> over 2 hours then 200 mg/m <sup>2</sup> over 22 hours) day 1 |
| <b>Cytarabine<sup>a</sup></b> | 0.5 grams/m <sup>2</sup> IV every 12 hours days 2 and 3 (4 total doses)                                                    |
| <b>Peg filgrastim</b>         | 0.1 mg/kg (max 6 mg) subcutaneous day 5                                                                                    |
| <b>Intrathecal therapy</b>    | Dosing below. Days 1 and 8                                                                                                 |

### Immunotherapy<sup>b</sup>

|                              |                                                                                                                                                                                                                                       |
|------------------------------|---------------------------------------------------------------------------------------------------------------------------------------------------------------------------------------------------------------------------------------|
| <b>Inotuzumab ozogamicin</b> | <u>Cycle 1:</u><br>0.6 mg/m <sup>2</sup> IV day 2 and 0.3 mg/m <sup>2</sup> days 8 and 15<br><u>Cycle 2 and after:</u><br>0.3 mg/m <sup>2</sup> IV days 2 and 8                                                                       |
| <b>Blinatumomab</b>          | <u>Cycle 1:</u><br>5 mcg/m <sup>2</sup> /day (max 9 mcg/day) CIV days 14-17 then 15 mcg/m <sup>2</sup> /day (max 28 mcg/day) CIV days 18-29<br><u>Cycle 2 and after:</u><br>15 mcg/m <sup>2</sup> /day (max 28 mcg/day) CIV days 4-28 |
| <b>Rituximab</b>             | <u>All Cycles:</u><br>375 mg/m <sup>2</sup> IV days 2 and 8                                                                                                                                                                           |

**For Leukemia CNS1 or 2: The intrathecal therapies will consist of below:**

|                    |                     |                  |
|--------------------|---------------------|------------------|
| Methotrexate (MTX) | Age (yrs)<br>1-1.99 | Dose<br>MTX:8mg, |
|                    | 2-2.99              | MTX: 10mg        |
|                    | 3-8.99              | MTX: 12 mg       |
|                    | ≥9                  | MTX: 15 mg       |

**For Leukemia CNS 3: The intrathecal therapies will consist of triple therapies as listed below:**

|                                                                |                     |                                            |
|----------------------------------------------------------------|---------------------|--------------------------------------------|
| Methotrexate (MTX)<br>Hydrocortisone (HC)<br>Cytarabine (ARAC) | Age (yrs)<br>1-1.99 | Dose<br>MTX:8mg,<br>HC: 8mg,<br>ARAC: 16mg |
|                                                                | 2-2.99              | MTX: 10mg<br>HC: 10 mg<br>ARAC: 20 mg      |
|                                                                | 3-8.99              | MTX: 12 mg<br>HC: 12 mg<br>ARAC: 24 mg     |
|                                                                | ≥9                  | MTX: 15 mg<br>HC: 15 mg<br>ARAC: 30 mg     |

**Supplemental Table 1:** Abbreviations: mini-hCVD, hyper-fractionated cyclophosphamide, vincristine, and dexamethasone; IV, intravenous; subcutaneous, subcutaneously; CIV, continuous intravenous infusion.

Supportive care: ursodiol 5 mg/kg orally twice daily starting day 1 if inotuzumab administered; urine alkalinization for methotrexate with continuous IV sodium acetate at 2-times maintenance fluid rate to maintain urine pH >7. Leucovorin rescue began 12 hours after end of methotrexate infusion 15 mg/m<sup>2</sup> IV every 6 hours until methotrexate level <0.01 mcmol/L. Methotrexate levels obtained at end of infusion and every 24 hours thereafter until level <0.01 mcmol/L.

<sup>a</sup> Cytarabine delayed until methotrexate level less than 20 mcmol/L if necessary

<sup>b</sup> Immunotherapy administered based on patient expression of CD19 (blinatumomab), CD20 (rituximab), and/or CD22 (inotuzumab ozogamicin)

**Supplementary Table 2: Adverse Events per CTCAE v5**

| <b>Adverse Event, N (%)</b>           | <b>Grade 2</b> | <b>Grade 3</b> | <b>Grade 4</b> |
|---------------------------------------|----------------|----------------|----------------|
| <b>VOD/SOS during subsequent HSCT</b> | 0              | 1 (10)         | 1 (10)         |
| <b>Cytokine release syndrome</b>      | 0              | 0              | 0              |
| <b>Febrile neutropenia</b>            | 0              | 3 (30)         | 0              |
| <b>Sepsis</b>                         | 0              | 1 (10)         | 0              |
| <b>INR increase</b>                   | 2 (20)         | 0              | 0              |
| <b>ALT increase</b>                   | 2 (20)         | 1 (10)         | 0              |
| <b>Hyperglycemia</b>                  | 1 (10)         | 1 (10)         | 1 (10)         |
| <b>Neuropathy</b>                     | 1 (10)         | 0              | 0              |
| <b>Decreased Fibrinogen</b>           | 1 (10)         | 0              | 0              |
| <b>Constipation</b>                   | 1 (10)         | 0              | 0              |

Supplemental Table 2: Abbreviations: INR- International normalized ratio. ALT- Alanine transaminase. VOD- Veno-Occlusive disease. SOS- Sinusoidal obstructive syndrome. HSCT- hematopoietic stem cell transplant.
